# Supplementary material for: Novel spectrofluorometric approach for assessing vilazodone by blocking photoinduced electron transfer: analytical performance, and greenness–blueness evaluation
Source: Royal Society of Chemistry journal article supplement (doi:10.1039/d3ra08034j), 2024-01-01
Supplement: d3ra08034j1.pdf [file d3ra08034j1.pdf]

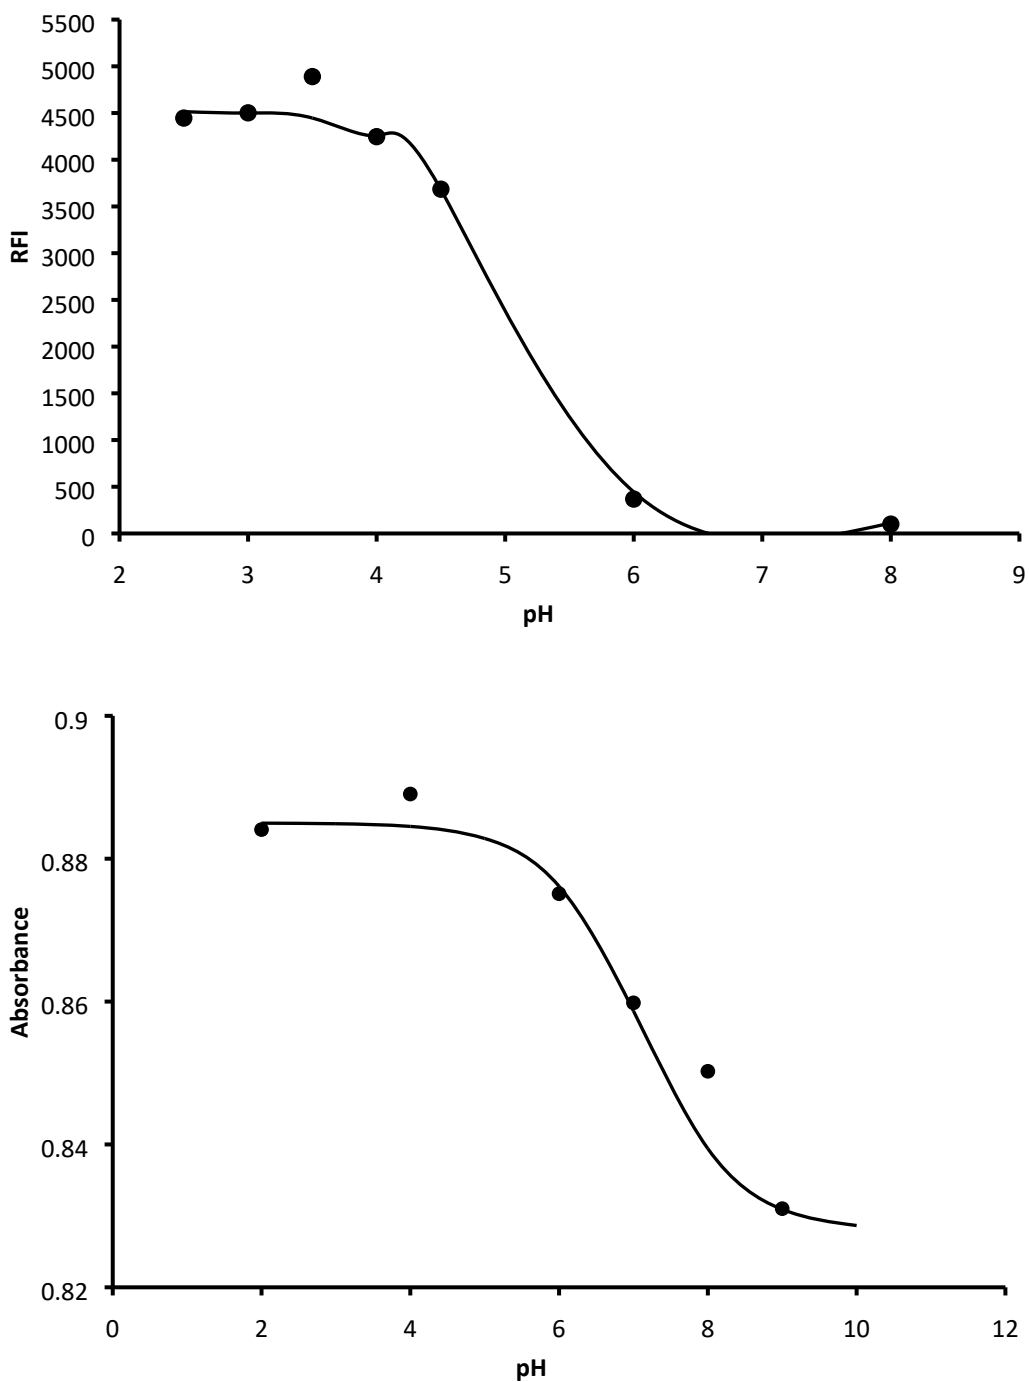

**S1 Fig.** Effect of different pH on relative fluorescence intensity of 200 ng mL<sup>-1</sup> VLD (Upper panel) and absorbance of 3.0 μg mL<sup>-1</sup> VLD (Lower panel).

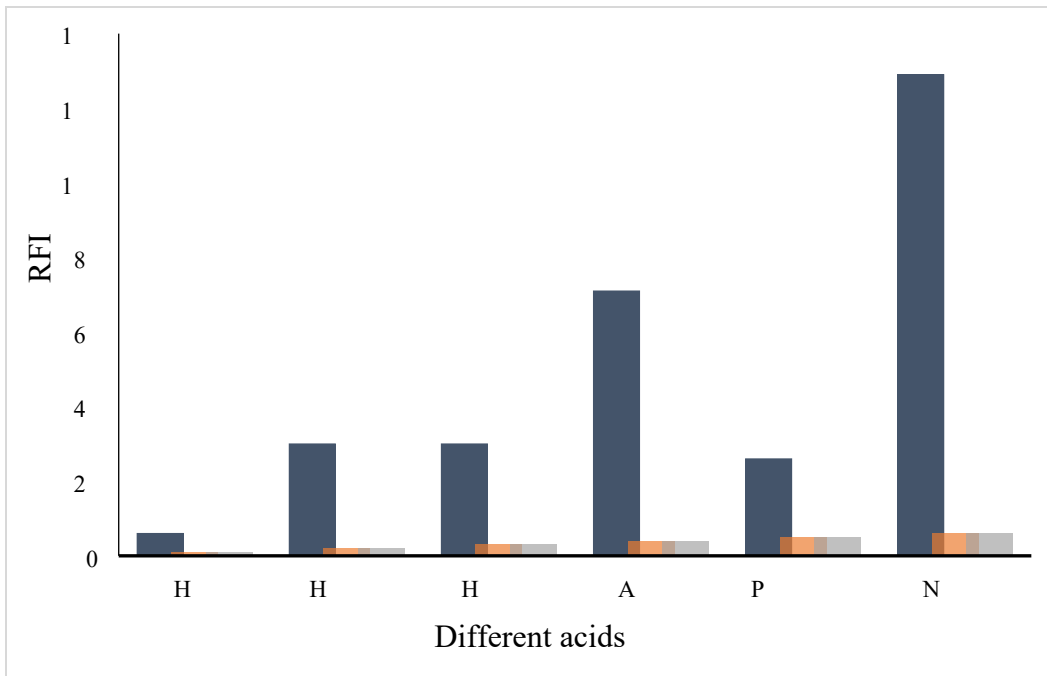

**S2 fig.** Effect of different acids on relative fluorescence intensity of 200 ng mL<sup>-1</sup> VLD

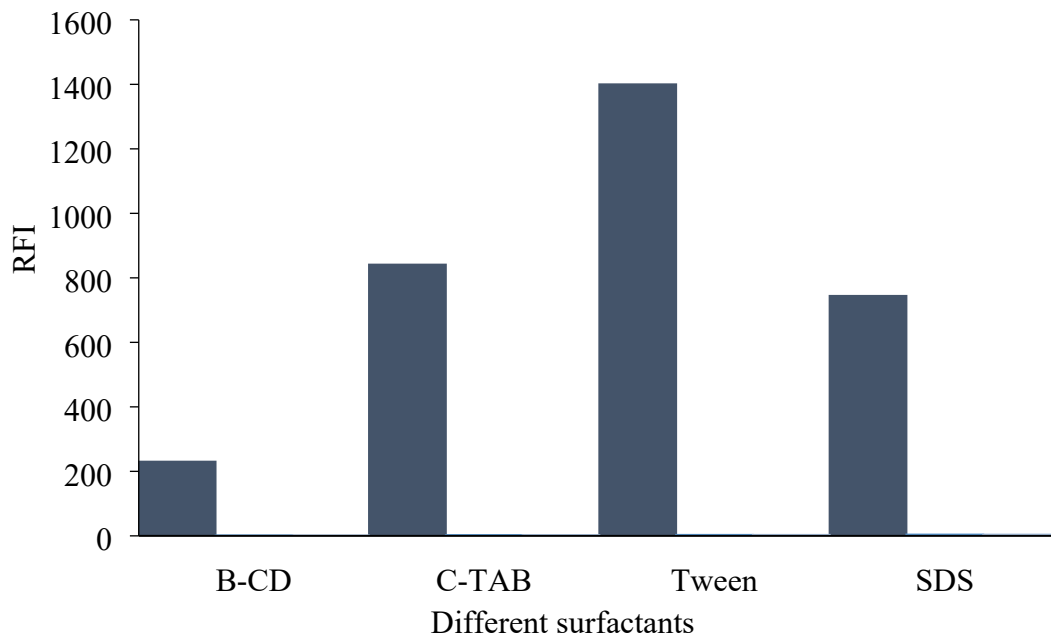

**S3 Fig.** Effect of different surfactants on relative fluorescence intensity of 200 ng mL<sup>-1</sup> VLD.

**S1 Table.** The application of the developed method to estimating the drug in spiked human plasma.

| Concentration (ngmL <sup>-1</sup> ) | Mean* ± SD    | %RSD |
|-------------------------------------|---------------|------|
| 50                                  | 98.80 ± 0.99  | 1.00 |
| 100                                 | 100.50 ± 0.46 | 0.46 |
| 200                                 | 96.36 ± 2.22  | 2.23 |
| 300                                 | 104.54 ± 0.31 | 0.30 |

\* The value is the mean of three replicate measurements.

**S2 (Table)** The 10 factors utilized in evaluation of the proposed method using Blue Applicability Grade Index (BAGI)

| Parameter                          | Rating          | Remarks                                                                               |
|------------------------------------|-----------------|---------------------------------------------------------------------------------------|
| 1. Type of Analysis                | moderately blue | Method is categorized as quantitative.                                                |
| 2. Multi-Analyte Procedure         | white           | One component is determined by the approach                                           |
| 3. Analytical Technique Used       | moderate blue   | A spectrofluorometer device was used, which is easily accessible in most labs.        |
| 4. Simultaneous Sample Preparation | light blue      | The suggested method's simultaneous preparation's ease of use and time-saving nature. |
| 5. Sample                          | moderately      | It involve little and no payment for sample                                           |

|                             |                  |                                                                                                                                                                                          |
|-----------------------------|------------------|------------------------------------------------------------------------------------------------------------------------------------------------------------------------------------------|
| Preparation                 | blue             | preparation.                                                                                                                                                                             |
| 6. Samples Per Hour         | dark blue        |                                                                                                                                                                                          |
| 7. Availability of Reagents | dark blue        | there are no derivative reagents—common reagents that are sold commercially                                                                                                              |
| 8. Preconcentration         | dark blue        | it doesn't require preconcentration.                                                                                                                                                     |
| 9. Automation of Device     | white            | Procedures with manual devices                                                                                                                                                           |
| 10. Amount of Samples       | moderate<br>blue | The sample volume is small and direct fluorometric technique<br><br>Less than 10 mL or (g) of food or environmental material, and less than 100 $\mu$ L or (mg) of bioanalytical sample. |
